# Supplementary material for: Nucleus accumbens inflammation mediates anxiodepressive behavior and compulsive sucrose seeking elicited by saturated dietary fat
Source: PubMed Central journal article supplement — Mol Metab. 2018 Jan 31;10:1–13. doi: 10.1016/j.molmet.2018.01.018 (PMC5985233; doi:10.1016/j.molmet.2018.01.018), 2018-01-31
Supplement: mmc1.pdf [file mmc1.pdf]

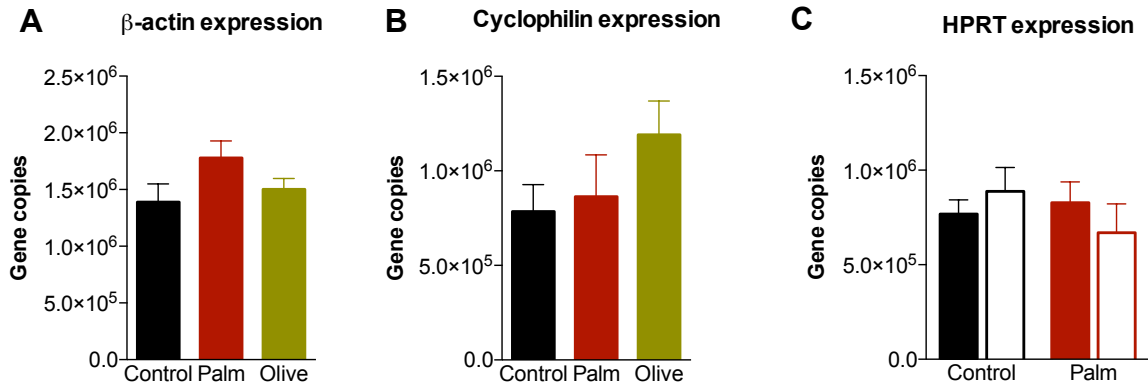

**Figure S1. Housekeeping genes expression.** (A, B)  $\beta$ -actin and cyclophilin mRNA levels for relative expression of pro-inflammatory markers in Figure 3A (n=5-8/group). (C) HPRT mRNA expression in nucleus accumbens for relative expression of pro-inflammatory markers in Figure 4I (n=7-10/group). Group mean  $\pm$  SEM; two-way analysis of variance, Bonferroni post-hoc.

**A**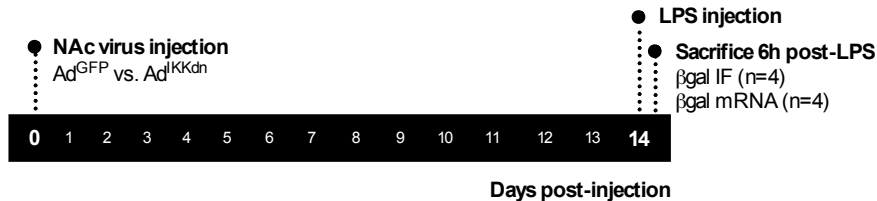**B**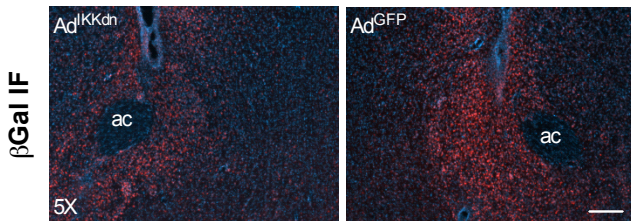**C**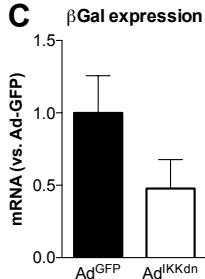

**Figure S2. Placement and titer validation of nucleus accumbens IKK/NFκB inhibition.** (A) Timeline depicting lipopolysaccharide (LPS) treatment and sacrifice following NAc virus injection. (B) βgal immunofluorescence (red) in nucleus accumbens of NFκB-LacZ reporter mice injected with Ad<sup>IKKdn</sup> in the right hemisphere and Ad<sup>GFP</sup> in the left hemisphere and treated with an intraperitoneal lipopolysaccharide (LPS) injection 6h prior to sacrifice. 5X magnification, 200μm scale bar. (C) Nucleus accumbens mRNA levels of βgal in NFκB-LacZ reporter mice injected with Ad<sup>GFP</sup> and Ad<sup>IKKdn</sup> (n=4/group).

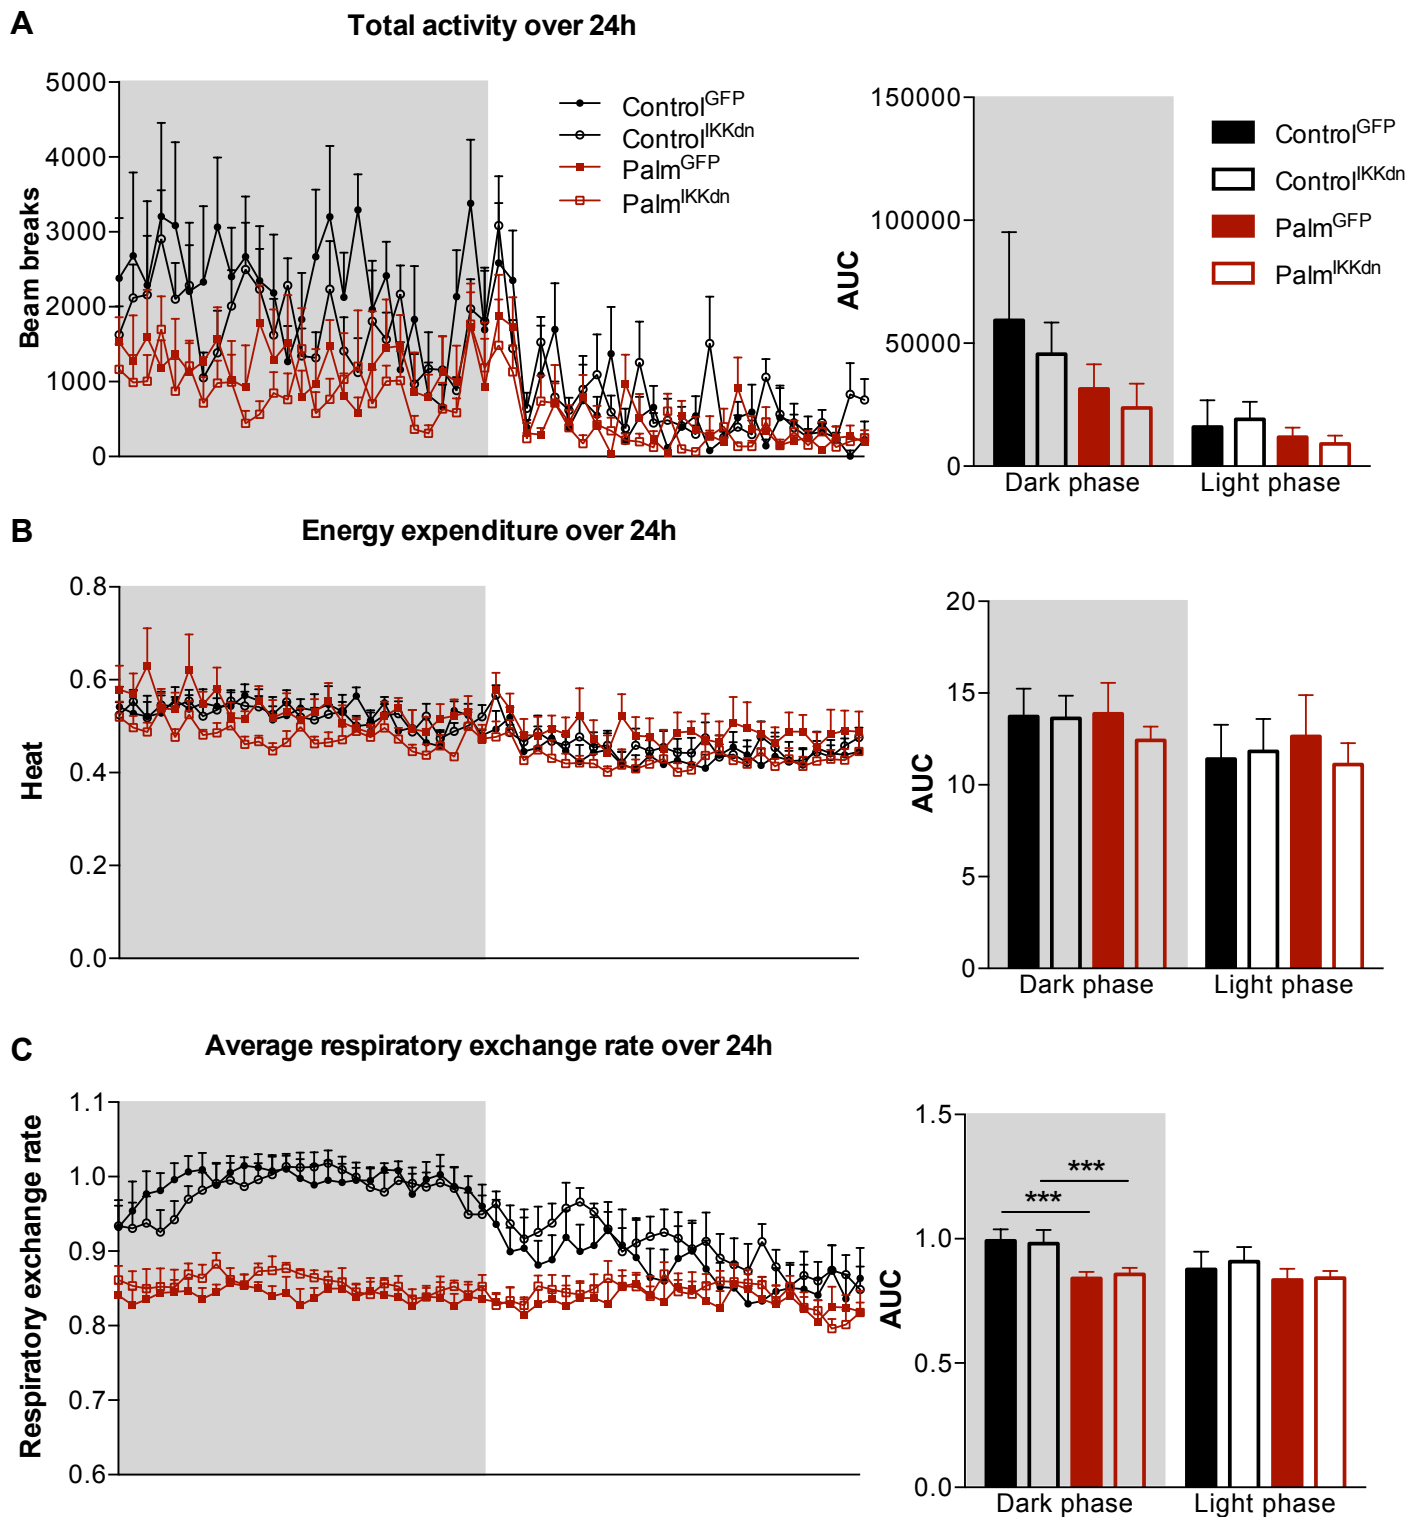

**Figure S3. Viral inhibition of IKK $\beta$ /NF $\kappa$ B in nucleus accumbens does not affect metabolic functions. (A) Locomotor activity, (B) energy expenditure and (C) respiratory exchange rate over 24h (n=5-7/group). Palm HFD significantly reduces mean respiratory exchange rate during dark phase in both viral conditions. Two-way analysis of variance; Bonferroni post hoc. \*\*\*p<0.001.**

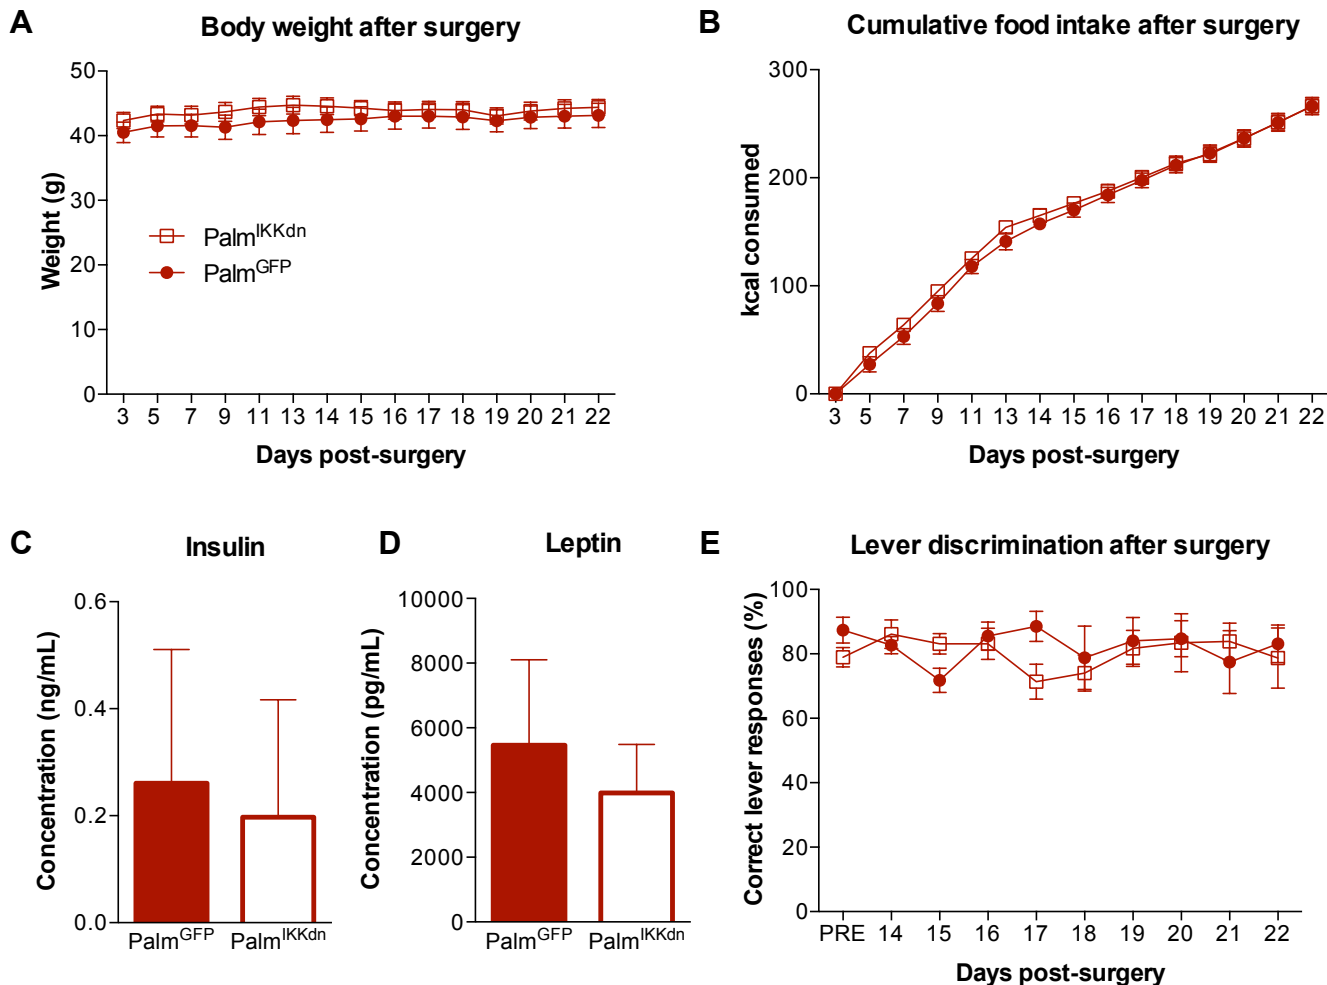

**Figure S4. Nucleus accumbens IKK/NF $\kappa$ B inhibition does not affect body weight, food intake, lever discrimination or plasma levels of insulin and leptin.** (A, B) Changes in sucrose motivation are not related to differential effects of Ad<sup>IKKdn</sup> and Ad<sup>GFP</sup> adenovirus on body weight nor food intake and lever discrimination after stereotaxic surgery (n=5-6/group). (C, D) Circulating levels of insulin and leptin are also unaffected by viral intervention (n=6-8/group). (E) Preference for correct lever is also unaltered by viral intervention (n=5-6/group). Group mean  $\pm$  SEM; two-way analysis of variance, Bonferroni post hoc and unpaired t-test.
